# Supplementary material for: Bayesian Optimization of Wet-Impregnated Co-Mo/Al2O3 Catalyst for Maximizing the Yield of Carbon Nanotube Synthesis
Source: MDPI journal article supplement (doi:10.3390/nano14010075), 2023-12-26
Supplement: s1 [file s1]

**Supplementary material:**

**Bayesian optimization of wet-impregnated Co-Mo/Al<sub>2</sub>O<sub>3</sub> catalyst for  
maximizing the yield of carbon nanotube synthesis**

Sang Su Shin <sup>1,†</sup>, Hyeongyun Song <sup>1,†</sup>, Yeon Su Shin <sup>1</sup>, Jaegun Lee <sup>1,2,\*</sup>, and Tae Hoon Seo <sup>3,\*</sup>

<sup>1</sup> School of Chemical Engineering, Pusan National University, Busandaehak-ro 63beon-gil, Geumjeoung-gu, Busan 46241, Republic of Korea

<sup>2</sup> Department of Organic Material Science and Engineering, Pusan National University, Busandaehak-ro 63beon-gil, Geumjeoung-gu, Busan 46241, Republic of Korea

<sup>3</sup> Green Energy and Nano Technology & R&D Group, Korea Institute of Industrial Technology (KITECH), Gwangju 61012, Republic of Korea

<sup>†</sup> These authors contributed equally to this work.

<sup>\*</sup> Corresponding authors: jglee@pusan.ac.kr (Jaegun Lee), thseo@kitech.re.kr (Tae Hoon Seo)

## List of Supplementary Table and Figure Captions

**Table S1.** Predicted and measured value of carbon yield in each iteration when using EI

**Table S2.** Predicted and measured value of carbon yield in each iteration when using OKG

**Table S3.** Normalized difference between predicted and measured value of carbon yield in each iteration when using EI

**Table S4.** Normalized difference between predicted and measured value of carbon yield in each iteration when using OKG

**Table S5.** Database used to draw contour plot predicting carbon yield when using EI

**Table S6.** Database used to draw contour plot predicting carbon yield when using OKG

**Figure S1.** EDS analysis of Fe catalyst distributed on the  $\text{Al}_2\text{O}_3$ .

**Figure S2.** TEM image of as-synthesized CNTs.

**Table S1.** Predicted and measured value of carbon yield in each iteration when using EI

| Iteration number | Metal wt.% | Co wt.% | Mo wt.% | Drying temperature [°C] | Calcination temperature [°C] | Predicted value of carbon yield [%] | Carbon yield [%] |
|------------------|------------|---------|---------|-------------------------|------------------------------|-------------------------------------|------------------|
| 1                | 61         | 57      | 4       | 123                     | 433                          | 236.4                               | 161.0 ± 4.2      |
| 2                | 70         | 52      | 18      | 80                      | 300                          | 223.6                               | 107.7 ± 14.8     |
| 3                | 59         | 48      | 11      | 154                     | 300                          | 236.8                               | 166.1 ± 8.9      |
| 4                | 42         | 42      | 0       | 183                     | 502                          | 195.2                               | 148.8 ± 5.6      |
| 5                | 40         | 33      | 7       | 142                     | 531                          | 196.6                               | 164.8 ± 6.8      |
| 6                | 70         | 51      | 19      | 124                     | 300                          | 219.6                               | 160.8 ± 16.5     |
| 7                | 58         | 47      | 11      | 108                     | 300                          | 219.9                               | 133.6 ± 6.2      |
| 8                | 48         | 42      | 6       | 145                     | 568                          | 227.6                               | 212.5 ± 18.1     |
| 9                | 66         | 59      | 7       | 151                     | 300                          | 230.0                               | 167.1 ± 6.0      |
| 10               | 45         | 45      | 0       | 129                     | 634                          | 201.9                               | 279.1 ± 15.4     |
| 11               | 46         | 46      | 0       | 139                     | 766                          | 248.4                               | 499.0 ± 21.1     |
| 12               | 46         | 46      | 0       | 138                     | 832                          | 479.9                               | 399.1 ± 24.9     |
| 13               | 46         | 46      | 0       | 164                     | 759                          | 455.1                               | 337.0 ± 17.3     |
| 14               | 51         | 51      | 0       | 134                     | 756                          | 462.4                               | 295.1 ± 8.1      |
| 15               | 44         | 44      | 0       | 134                     | 767                          | 484.7                               | 356.7 ± 12.6     |
| 16               | 47         | 43      | 4       | 136                     | 755                          | 474.4                               | 362.0 ± 10.8     |
| 17               | 47         | 47      | 0       | 143                     | 737                          | 488.7                               | 446.7 ± 8.9      |
| 18               | 46         | 46      | 0       | 125                     | 766                          | 471.0                               | 459.6 ± 15.2     |
| 19               | 49         | 49      | 0       | 91                      | 663                          | 191.6                               | 224.9 ± 3.8      |
| 20               | 49         | 49      | 0       | 93                      | 865                          | 189.1                               | 262.8 ± 5.7      |
| 21               | 56         | 56      | 0       | 95                      | 813                          | 150.2                               | 225.7 ± 4.9      |
| 22               | 52         | 40      | 12      | 93                      | 800                          | 163.9                               | 335.7 ± 44.1     |
| 23               | 53         | 42      | 11      | 117                     | 916                          | 230.2                               | 324.8 ± 17.6     |
| 24               | 55         | 41      | 14      | 127                     | 779                          | 247.9                               | 290.9 ± 14.8     |

**Table S2.** Predicted and measured value of carbon yield in each iteration when using OKG

| Iteration number | Metal wt.% | Co wt.% | Mo wt.% | Drying temperature [°C] | Calcination temperature [°C] | Predicted value of carbon yield [%] | Carbon yield [%] |
|------------------|------------|---------|---------|-------------------------|------------------------------|-------------------------------------|------------------|
| 1                | 64         | 59      | 5       | 86                      | 400                          | 230.5                               | 167.8 ± 8.8      |
| 2                | 61         | 51      | 10      | 174                     | 341                          | 232.8                               | 165.9 ± 15.4     |
| 3                | 43         | 43      | 0       | 157                     | 501                          | 220.0                               | 177.5 ± 18.2     |
| 4                | 52         | 44      | 8       | 123                     | 479                          | 226.3                               | 183.2 ± 12.0     |
| 5                | 39         | 39      | 0       | 119                     | 563                          | 217.5                               | 219.6 ± 1.9      |
| 6                | 50         | 50      | 0       | 125                     | 578                          | 220.1                               | 207.1 ± 7.4      |
| 7                | 60         | 46      | 14      | 99                      | 308                          | 224.3                               | 157.7 ± 16.5     |
| 8                | 43         | 38      | 5       | 134                     | 625                          | 204.8                               | 229.8 ± 15.3     |
| 9                | 40         | 34      | 6       | 130                     | 512                          | 214.4                               | 183.5 ± 5.1      |
| 10               | 41         | 41      | 0       | 132                     | 753                          | 221.8                               | 493.6 ± 27.7     |
| 11               | 41         | 41      | 0       | 154                     | 774                          | 472.0                               | 357.4 ± 8.5      |
| 12               | 47         | 47      | 0       | 121                     | 803                          | 476.6                               | 321.4 ± 6.6      |
| 13               | 36         | 36      | 0       | 124                     | 758                          | 473.8                               | 327.2 ± 29.2     |
| 14               | 41         | 41      | 0       | 125                     | 797                          | 465.0                               | 298.7 ± 21.1     |
| 15               | 70         | 49      | 21      | 242                     | 353                          | 91.8                                | 128.7 ± 3.9      |
| 16               | 46         | 46      | 0       | 102                     | 730                          | 491.8                               | 435.7 ± 18.8     |
| 17               | 44         | 44      | 0       | 142                     | 719                          | 487.8                               | 375.2 ± 49.4     |
| 18               | 43         | 37      | 6       | 120                     | 751                          | 456.2                               | 328.4 ± 32.5     |
| 19               | 1          | 1       | 0       | 260                     | 626                          | 54.2                                | -13.4 ± 3.7      |
| 20               | 50         | 50      | 0       | 131                     | 587                          | 201.4                               | 168.8 ± 2.5      |
| 21               | 48         | 47      | 1       | 96                      | 539                          | 281.5                               | 185.1 ± 5.9      |
| 22               | 40         | 40      | 0       | 119                     | 738                          | 461.2                               | 362.2 ± 8.9      |
| 23               | 50         | 50      | 0       | 133                     | 757                          | 474.9                               | 310.1 ± 11.7     |
| 24               | 38         | 38      | 0       | 138                     | 744                          | 481.2                               | 359.4 ± 1.2      |

**Table S3.** Normalized difference between predicted and measured value of carbon yield in each iteration when using EI.

| Iteration number | Predicted value of carbon yield [%] | Carbon yield [%] | Normalized difference |
|------------------|-------------------------------------|------------------|-----------------------|
| 1                | 236.4                               | 161.0 ± 4.2      | 0.32                  |
| 2                | 223.6                               | 107.7 ± 14.8     | 0.52                  |
| 3                | 236.8                               | 166.1 ± 8.9      | 0.30                  |
| 4                | 195.2                               | 148.8 ± 5.6      | 0.24                  |
| 5                | 196.6                               | 164.8 ± 6.8      | 0.16                  |
| 6                | 219.6                               | 160.8 ± 16.5     | 0.27                  |
| 7                | 219.9                               | 133.6 ± 6.2      | 0.39                  |
| 8                | 227.6                               | 212.5 ± 18.1     | 0.07                  |
| 9                | 230.0                               | 167.1 ± 6.0      | 0.27                  |
| 10               | 201.9                               | 279.1 ± 15.4     | 0.38                  |
| 11               | 248.4                               | 499.0 ± 21.1     | 1.01                  |
| 12               | 479.9                               | 399.1 ± 24.9     | 0.17                  |
| 13               | 455.1                               | 337.0 ± 17.3     | 0.26                  |
| 14               | 462.4                               | 295.1 ± 8.1      | 0.36                  |
| 15               | 484.7                               | 356.7 ± 12.6     | 0.26                  |
| 16               | 474.4                               | 362.0 ± 10.8     | 0.24                  |
| 17               | 488.7                               | 446.7 ± 8.9      | 0.09                  |
| 18               | 471.0                               | 459.6 ± 15.2     | 0.02                  |
| 19               | 191.6                               | 224.9 ± 3.8      | 0.17                  |
| 20               | 189.1                               | 262.8 ± 5.7      | 0.39                  |
| 21               | 150.2                               | 225.7 ± 4.9      | 0.50                  |
| 22               | 163.9                               | 335.7 ± 44.1     | 1.05                  |
| 23               | 230.2                               | 324.8 ± 17.6     | 0.41                  |
| 24               | 247.9                               | 290.9 ± 14.8     | 0.17                  |

**Table S4.** Normalized difference between predicted and measured value of carbon yield in each iteration when using OKG.

| Iteration number | Predicted value of carbon yield [%] | Carbon yield [%] | Normalized difference |
|------------------|-------------------------------------|------------------|-----------------------|
| 1                | 230.5                               | 167.8 ± 8.8      | 0.27                  |
| 2                | 232.8                               | 165.9 ± 15.4     | 0.29                  |
| 3                | 220.0                               | 177.5 ± 18.2     | 0.19                  |
| 4                | 226.3                               | 183.2 ± 12.0     | 0.19                  |
| 5                | 217.5                               | 219.6 ± 1.9      | 0.01                  |
| 6                | 220.1                               | 207.1 ± 7.4      | 0.06                  |
| 7                | 224.3                               | 157.7 ± 16.5     | 0.30                  |
| 8                | 204.8                               | 229.8 ± 15.3     | 0.12                  |
| 9                | 214.4                               | 183.5 ± 5.1      | 0.14                  |
| 10               | 221.8                               | 493.6 ± 27.7     | 1.22                  |
| 11               | 472.0                               | 357.4 ± 8.5      | 0.24                  |
| 12               | 476.6                               | 321.4 ± 6.6      | 0.33                  |
| 13               | 473.8                               | 327.2 ± 29.2     | 0.31                  |
| 14               | 465.0                               | 298.7 ± 21.1     | 0.36                  |
| 15               | 91.8                                | 128.7 ± 3.9      | 0.40                  |
| 16               | 491.8                               | 435.7 ± 18.8     | 0.11                  |
| 17               | 487.8                               | 375.2 ± 49.4     | 0.23                  |
| 18               | 456.2                               | 328.4 ± 32.5     | 0.28                  |
| 19               | 54.2                                | -13.4 ± 3.7      | 1.25                  |
| 20               | 201.4                               | 168.8 ± 2.5      | 0.16                  |
| 21               | 281.5                               | 185.1 ± 5.9      | 0.34                  |
| 22               | 461.2                               | 362.2 ± 8.9      | 0.21                  |
| 23               | 474.9                               | 310.1 ± 11.7     | 0.35                  |
| 24               | 481.2                               | 359.4 ± 1.2      | 0.25                  |

**Table S5.** Database used to draw contour plot predicting carbon yield when using EI

| Number | Metal wt. % | Co wt. % | Mo wt. % | Drying temperature<br>[°C] | Calcination temperature<br>[°C] | Carbon yield<br>[%] |
|--------|-------------|----------|----------|----------------------------|---------------------------------|---------------------|
| 1      | 1           | 1        | 0        | 228                        | 829                             | -11.8 ± 6.0         |
| 2      | 70          | 61       | 9        | 205                        | 789                             | 87.2 ± 16.8         |
| 3      | 50          | 2        | 48       | 224                        | 755                             | -31.6 ± 3.5         |
| 4      | 9           | 8        | 1        | 209                        | 747                             | 20.2 ± 7.8          |
| 5      | 10          | 1        | 9        | 155                        | 729                             | 4.0 ± 15.7          |
| 6      | 63          | 35       | 28       | 92                         | 579                             | 109.8 ± 7.0         |
| 7      | 45          | 44       | 1        | 150                        | 567                             | 233.7 ± 8.2         |
| 8      | 41          | 32       | 9        | 270                        | 539                             | 159.7 ± 57.3        |
| 9      | 22          | 0        | 22       | 145                        | 431                             | -13.9 ± 12.1        |
| 10     | 60          | 21       | 39       | 233                        | 426                             | 8.9 ± 15.8          |
| 11     | 43          | 2        | 41       | 291                        | 406                             | -19.8 ± 4.3         |
| 12     | 45          | 44       | 1        | 132                        | 354                             | 170.6 ± 15.3        |
| 13     | 65          | 54       | 11       | 114                        | 311                             | 244.0 ± 20.5        |
| 14     | 61          | 57       | 4        | 123                        | 433                             | 161.0 ± 4.2         |
| 15     | 70          | 52       | 18       | 80                         | 300                             | 107.7 ± 14.8        |
| 16     | 59          | 48       | 11       | 154                        | 300                             | 166.1 ± 8.9         |
| 17     | 42          | 42       | 0        | 183                        | 502                             | 148.8 ± 5.6         |
| 18     | 40          | 33       | 7        | 142                        | 531                             | 164.8 ± 6.8         |
| 19     | 70          | 51       | 19       | 124                        | 300                             | 160.8 ± 16.5        |
| 20     | 58          | 47       | 11       | 108                        | 300                             | 133.6 ± 6.2         |
| 21     | 48          | 42       | 6        | 145                        | 568                             | 212.5 ± 18.1        |
| 22     | 66          | 59       | 7        | 151                        | 300                             | 167.1 ± 6.0         |
| 23     | 45          | 45       | 0        | 129                        | 634                             | 279.1 ± 15.4        |
| 24     | 46          | 46       | 0        | 139                        | 766                             | 499.0 ± 21.1        |
| 25     | 46          | 46       | 0        | 138                        | 832                             | 399.1 ± 24.9        |
| 26     | 46          | 46       | 0        | 164                        | 759                             | 337.0 ± 17.3        |
| 27     | 51          | 51       | 0        | 134                        | 756                             | 295.1 ± 8.1         |
| 28     | 44          | 44       | 0        | 134                        | 767                             | 356.7 ± 12.6        |
| 29     | 47          | 43       | 4        | 136                        | 755                             | 362.0 ± 10.8        |
| 30     | 47          | 47       | 0        | 143                        | 737                             | 446.7 ± 8.9         |
| 31     | 46          | 46       | 0        | 125                        | 766                             | 459.6 ± 15.2        |
| 32     | 49          | 49       | 0        | 91                         | 663                             | 224.9 ± 3.8         |
| 33     | 49          | 49       | 0        | 93                         | 865                             | 262.8 ± 5.7         |
| 34     | 56          | 56       | 0        | 95                         | 813                             | 225.7 ± 4.9         |
| 35     | 52          | 40       | 12       | 93                         | 800                             | 335.7 ± 44.1        |
| 36     | 53          | 42       | 11       | 117                        | 916                             | 324.8 ± 17.6        |
| 37     | 55          | 41       | 14       | 127                        | 779                             | 290.9 ± 14.8        |

**Table S6.** Database used to draw contour plot predicting carbon yield when using OKG

| Number | Metal wt. % | Co wt. % | Mo wt. % | Drying temperature<br>[°C] | Calcination temperature<br>[°C] | Carbon yield<br>[%] |
|--------|-------------|----------|----------|----------------------------|---------------------------------|---------------------|
| 1      | 1           | 1        | 0        | 228                        | 829                             | -11.8 ± 6.0         |
| 2      | 70          | 61       | 9        | 205                        | 789                             | 87.2 ± 16.8         |
| 3      | 50          | 2        | 48       | 224                        | 755                             | -31.6 ± 3.5         |
| 4      | 9           | 8        | 1        | 209                        | 747                             | 20.2 ± 7.8          |
| 5      | 10          | 1        | 9        | 155                        | 729                             | 4.0 ± 15.7          |
| 6      | 63          | 35       | 28       | 92                         | 579                             | 109.8 ± 7.0         |
| 7      | 45          | 44       | 1        | 150                        | 567                             | 233.7 ± 8.2         |
| 8      | 41          | 32       | 9        | 270                        | 539                             | 159.7 ± 57.3        |
| 9      | 22          | 0        | 22       | 145                        | 431                             | -13.9 ± 12.1        |
| 10     | 60          | 21       | 39       | 233                        | 426                             | 8.9 ± 15.8          |
| 11     | 43          | 2        | 41       | 291                        | 406                             | -19.8 ± 4.3         |
| 12     | 45          | 44       | 1        | 132                        | 354                             | 170.6 ± 15.3        |
| 13     | 65          | 54       | 11       | 114                        | 311                             | 244.0 ± 20.5        |
| 14     | 64          | 59       | 5        | 86                         | 400                             | 167.8 ± 8.8         |
| 15     | 61          | 51       | 10       | 174                        | 341                             | 165.9 ± 15.4        |
| 16     | 43          | 43       | 0        | 157                        | 501                             | 177.5 ± 18.2        |
| 17     | 52          | 44       | 8        | 123                        | 479                             | 183.2 ± 12.0        |
| 18     | 39          | 39       | 0        | 119                        | 563                             | 219.6 ± 1.9         |
| 19     | 50          | 50       | 0        | 125                        | 578                             | 207.1 ± 7.4         |
| 20     | 60          | 46       | 14       | 99                         | 308                             | 157.7 ± 16.5        |
| 21     | 43          | 38       | 5        | 134                        | 625                             | 229.8 ± 15.3        |
| 22     | 40          | 34       | 6        | 130                        | 512                             | 183.5 ± 5.1         |
| 23     | 41          | 41       | 0        | 132                        | 753                             | 493.6 ± 27.7        |
| 24     | 41          | 41       | 0        | 154                        | 774                             | 357.4 ± 8.5         |
| 25     | 47          | 47       | 0        | 121                        | 803                             | 321.4 ± 6.6         |
| 26     | 36          | 36       | 0        | 124                        | 758                             | 327.2 ± 29.2        |
| 27     | 41          | 41       | 0        | 125                        | 797                             | 298.7 ± 21.1        |
| 28     | 70          | 49       | 21       | 242                        | 353                             | 128.7 ± 3.9         |
| 29     | 46          | 46       | 0        | 102                        | 730                             | 435.7 ± 18.8        |
| 30     | 44          | 44       | 0        | 142                        | 719                             | 375.2 ± 49.4        |
| 31     | 43          | 37       | 6        | 120                        | 751                             | 328.4 ± 32.5        |
| 32     | 1           | 1        | 0        | 260                        | 626                             | -13.4 ± 3.7         |
| 33     | 50          | 50       | 0        | 131                        | 587                             | 168.8 ± 2.5         |
| 34     | 48          | 47       | 1        | 96                         | 539                             | 185.1 ± 5.9         |
| 35     | 40          | 40       | 0        | 119                        | 738                             | 362.2 ± 8.9         |
| 36     | 50          | 50       | 0        | 133                        | 757                             | 310.1 ± 11.7        |
| 37     | 38          | 38       | 0        | 138                        | 744                             | 359.4 ± 1.2         |



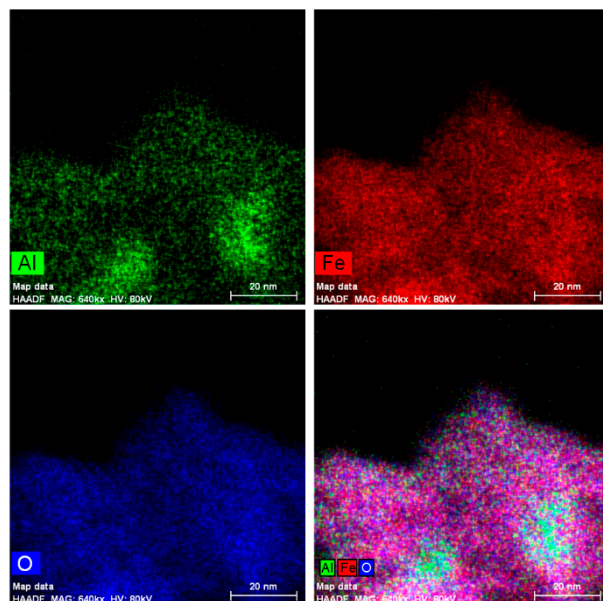

**Figure S1.** Energy-dispersive X-ray spectroscopy of Fe catalyst distributed on the  $\text{Al}_2\text{O}_3$ .

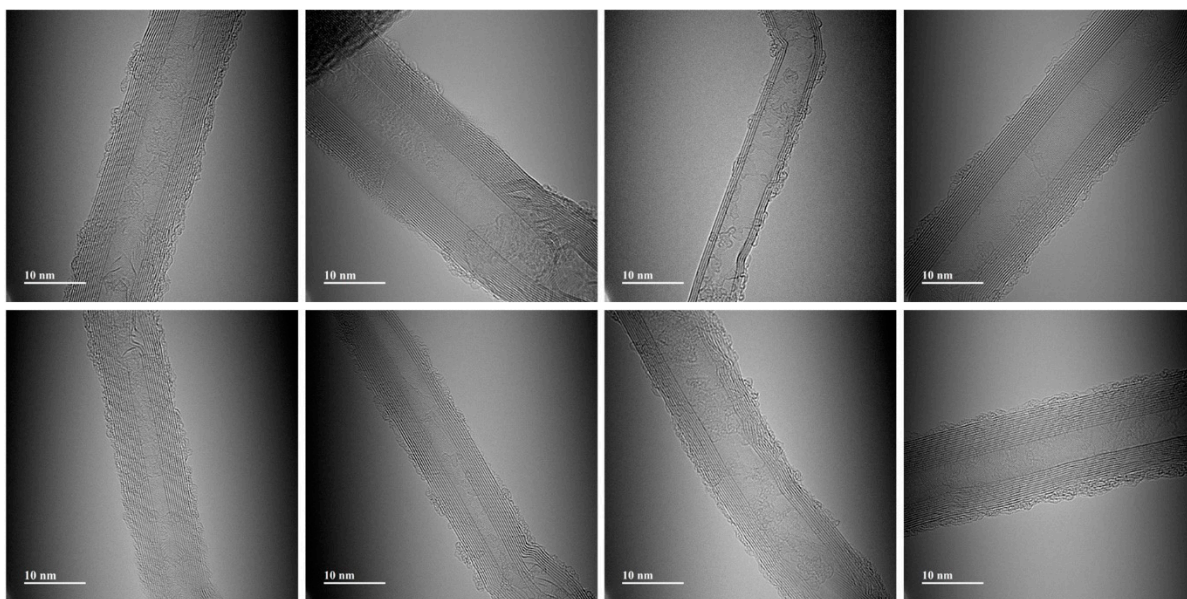

**Figure S2.** TEM image of as-synthesized CNTs.
